# Supplementary material for: Photophysical, electrochemical, and crystallographic investigation of conjugated fluoreno azomethines and their precursors
Source: Royal Society of Chemistry journal article supplement (doi:10.1039/b618098a), 2007-01-01
Supplement: b618098a.pdf [file b618098a.pdf]

## **Photophysical, Electrochemical, and Crystallographic Investigation of Conjugated Fluoreno Azomethines and Their Precursors**

**Sergio Andrés Pérez Guarín,<sup>a</sup> Stéphane Dufresne,<sup>a</sup> Derek Tsang,<sup>a,b</sup> Assa Sylla,<sup>a,c</sup> and W. G. Skene<sup>\*a</sup>**

<sup>a</sup> *Department of Chemistry, University of Montreal, Pavillon J.A. Bombardier, C.P. 6128, succ. Centre-ville, Montreal, QC, H3C 3J7, Canada Fax (514) 340-5290; Tel (514) 340-5174; E-mail: [w.skene@umontreal.ca](mailto:w.skene@umontreal.ca)*

<sup>b</sup> *Current address: University of Toronto, Toronto, Canada*

<sup>c</sup> *Current address: Université Pierre et Marie Curie, Paris, France*

Département de Chimie, Pavillon JA Bombardier, Université de Montréal, CP 6128, succ.  
Centreville, Montréal, Québec, CANADA, H3C 3J7,  
[w.skene@umontreal.ca](mailto:w.skene@umontreal.ca)

|                                                                                                                                                                                                                                           |    |
|-------------------------------------------------------------------------------------------------------------------------------------------------------------------------------------------------------------------------------------------|----|
| Figure 1 : $^1\text{H}$ spectrum of 5 (400 MHz, Acetone- $\text{d}_6$ ). .....                                                                                                                                                            | 5  |
| Figure 2 : $^1\text{H}$ spectrum of 7 (400 MHz, Chloroforme- $\text{d}$ ). .....                                                                                                                                                          | 6  |
| Figure 3 : $^1\text{H}$ spectrum of 8 (400 MHz, Acetone- $\text{d}_6$ ). .....                                                                                                                                                            | 7  |
| Figure 4: Normalized absorption (squares), fluorescence (circles), recorded in degassed dichloromethane, and phosphorescence (triangles) recorded at 77 K in a matrix of 4:1 ethanol / methanol of 2 $\lambda_{\text{ex}} = 290$ nm. .... | 8  |
| Figure 5: Normalized absorption (squares), fluorescence (circles), recorded in degassed dichloromethane, and phosphorescence (triangles) recorded at 77 K in a matrix of 4:1 ethanol / methanol of 3 $\lambda_{\text{ex}} = 292$ nm. .... | 9  |
| Figure 6: Normalized absorption (squares), fluorescence (circles), recorded in degassed dichloromethane, and phosphorescence (triangles) recorded at 77 K in a matrix of 4:1 ethanol / methanol of 4 $\lambda_{\text{ex}} = 280$ nm. .... | 10 |
| Figure 7: Normalized absorption (squares), fluorescence (circles), recorded in degassed dichloromethane, and phosphorescence (triangles) recorded at 77 K in a matrix of 4:1 ethanol / methanol of 5 $\lambda_{\text{ex}} = 316$ nm. .... | 11 |
| Figure 8: Normalized absorption (squares), fluorescence (circles), recorded in degassed dichloromethane, and phosphorescence (triangles) recorded at 77 K in a matrix of 4:1 ethanol / methanol of 6 $\lambda_{\text{ex}} = 339$ nm. .... | 12 |
| Figure 9: Normalized absorption (squares), fluorescence (circles), recorded in degassed dichloromethane, and phosphorescence (triangles) recorded at 77 K in a matrix of 4:1 ethanol / methanol of 7 $\lambda_{\text{ex}} = 327$ nm. .... | 13 |
| Figure 10: Normalized absorption (squares), fluorescence (circles), recorded in degassed dichloromethane of 8 $\lambda_{\text{ex}} = 361$ nm. ....                                                                                        | 14 |

|                                                                                                                                                                                                                                             |    |
|---------------------------------------------------------------------------------------------------------------------------------------------------------------------------------------------------------------------------------------------|----|
| Figure 11: Normalized absorption (squares), fluorescence (circles), recorded in degassed dichloromethane, and phosphorescence (triangles) recorded at 77 K in a matrix of 4:1 ethanol / methanol of 9 $\lambda_{\text{ex}} = 355$ nm. ....  | 15 |
| Figure 12: Normalized absorption (squares), fluorescence (circles), recorded in degassed dichloromethane, and phosphorescence (triangles) recorded at 77 K in a matrix of 4:1 ethanol / methanol of 10 $\lambda_{\text{ex}} = 386$ nm. .... | 16 |
| Figure 13: Fluorescence at 25 °C (squares) and at 77 K (circles) recorded in a degassed matrix of 4:1 ethanol / methanol of 10, $\lambda_{\text{ex}} = 386$ nm. ....                                                                        | 17 |
| Figure 14: Uncorrected cyclic voltammogram of 7 recorded in deaerated dichloromethane solution of 0.1 M of TBAPF6 using Ag/AgCl as reference and Pt as working electrodes. ....                                                             | 18 |
| Figure 15: Uncorrected cyclic voltammogram of 10 recorded in deaerated dichloromethane solution of 0.1 M of TBAPF6 using Ag/AgCl as reference and Pt as working electrodes. ....                                                            | 18 |

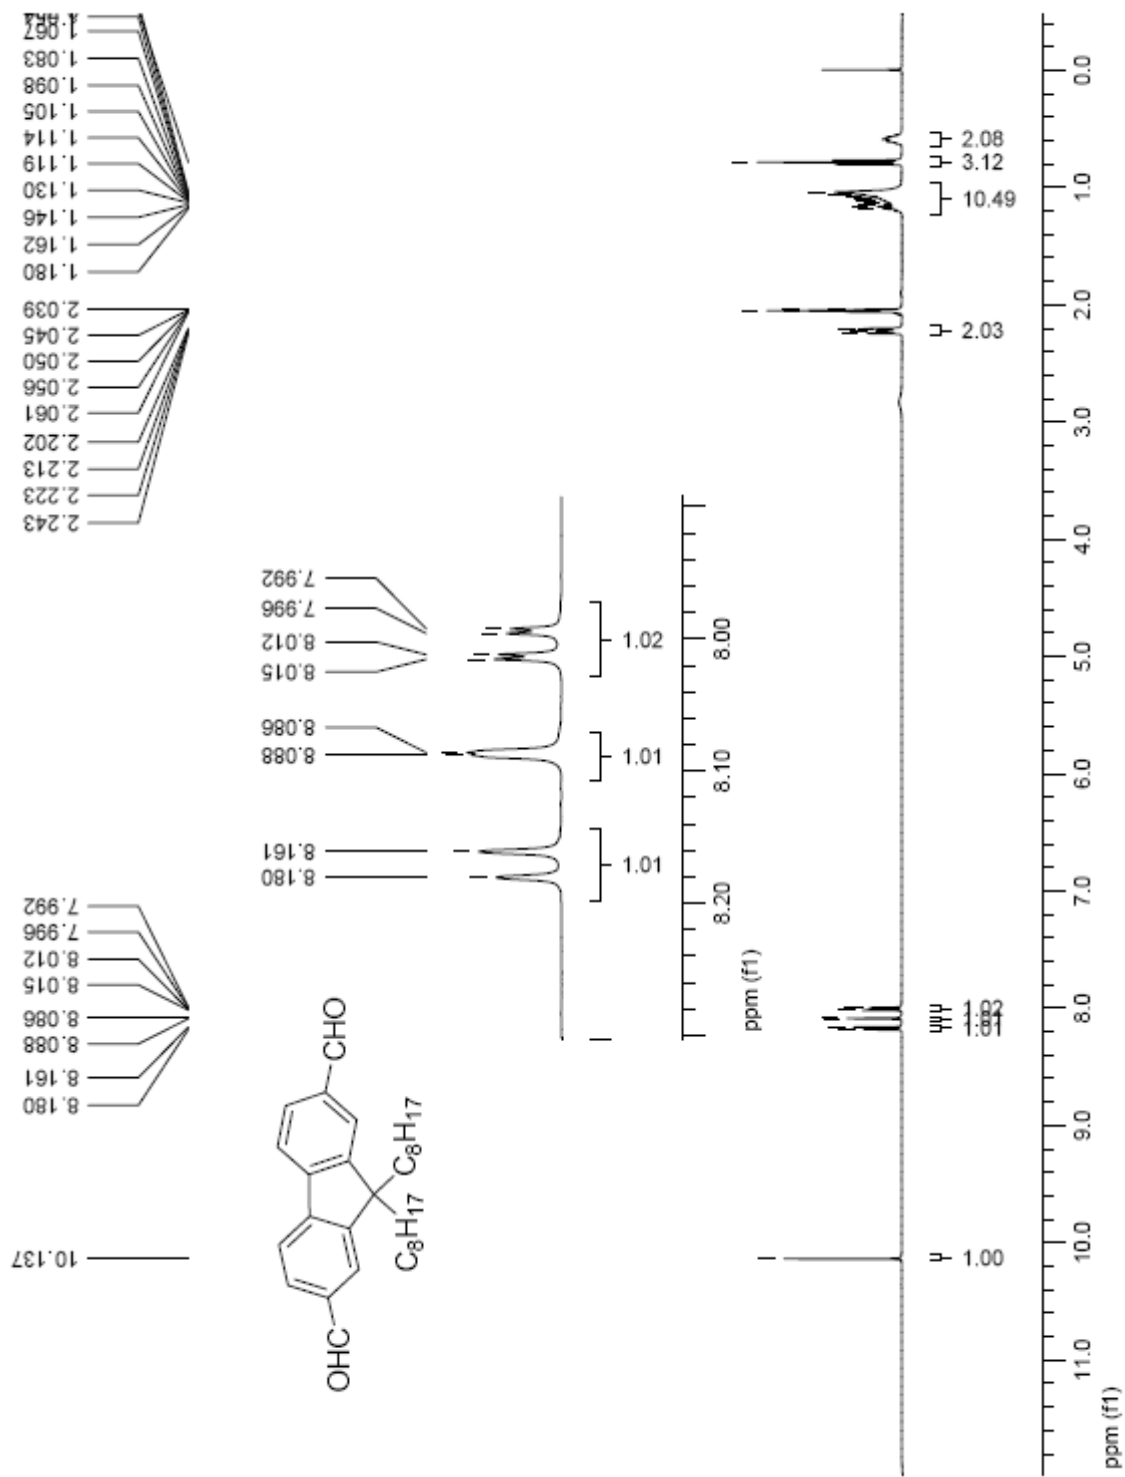

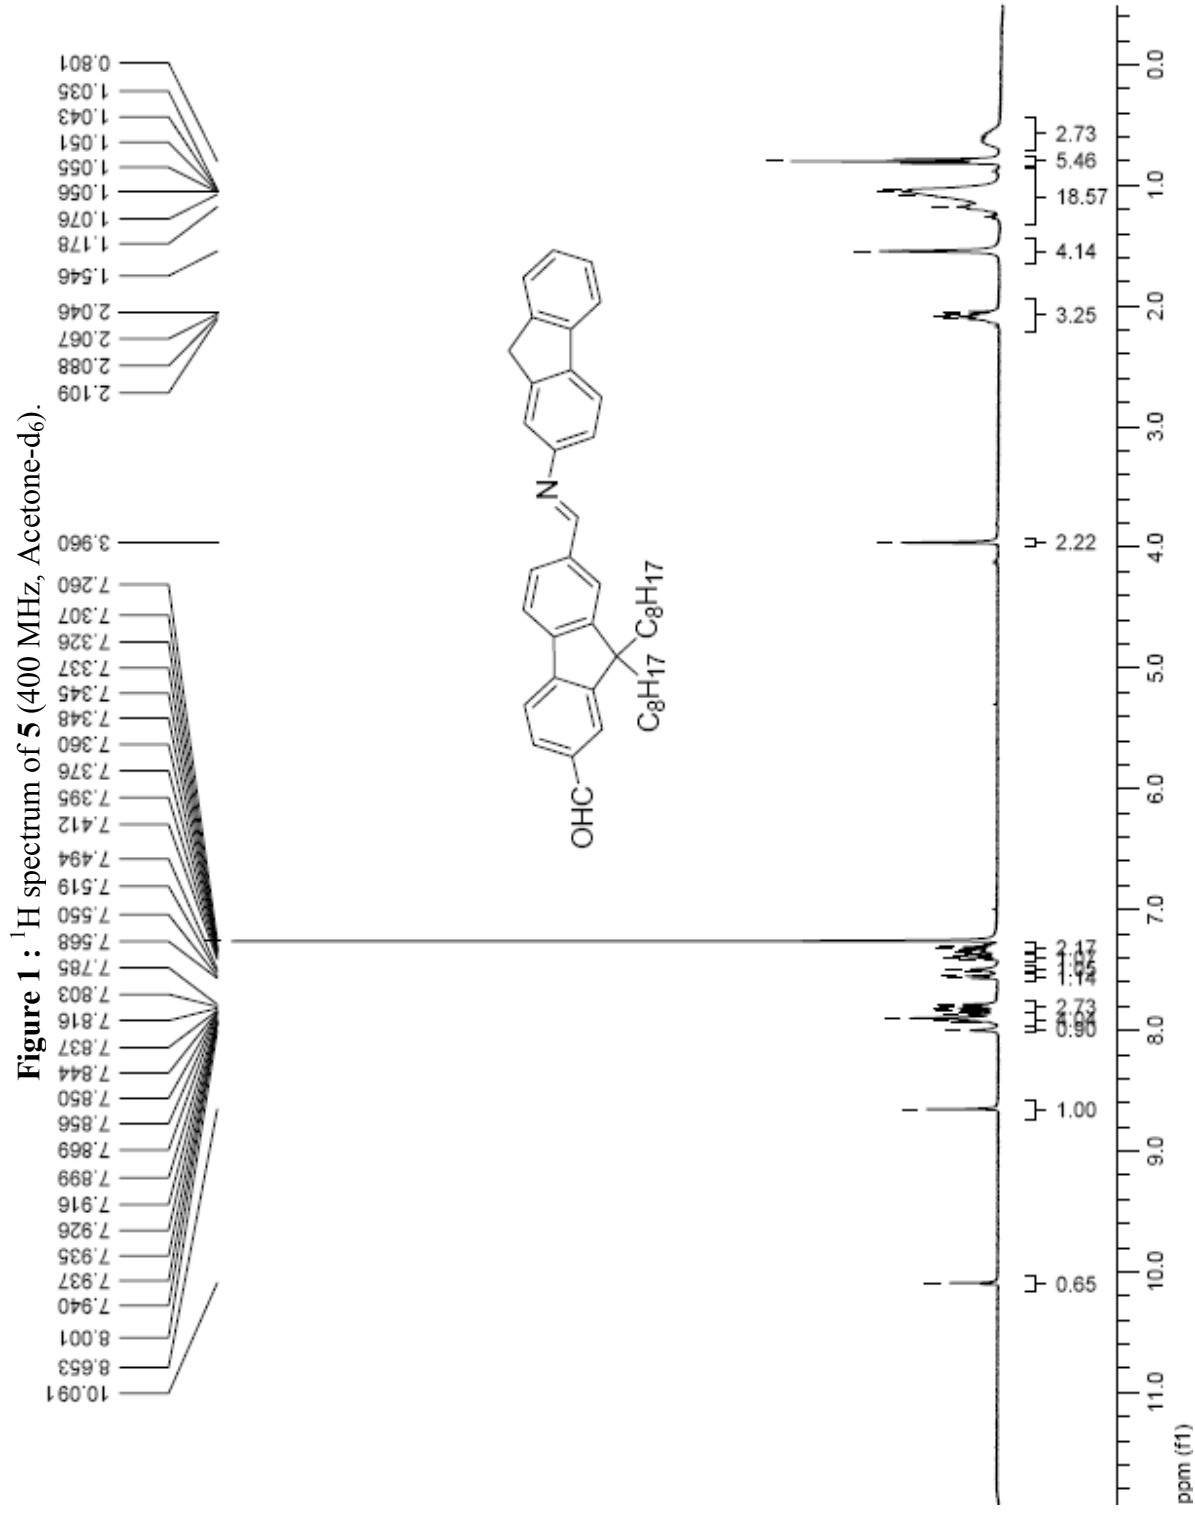

Figure 2 :  $^1\text{H}$  spectrum of 7 (400 MHz, Chloroform-d).

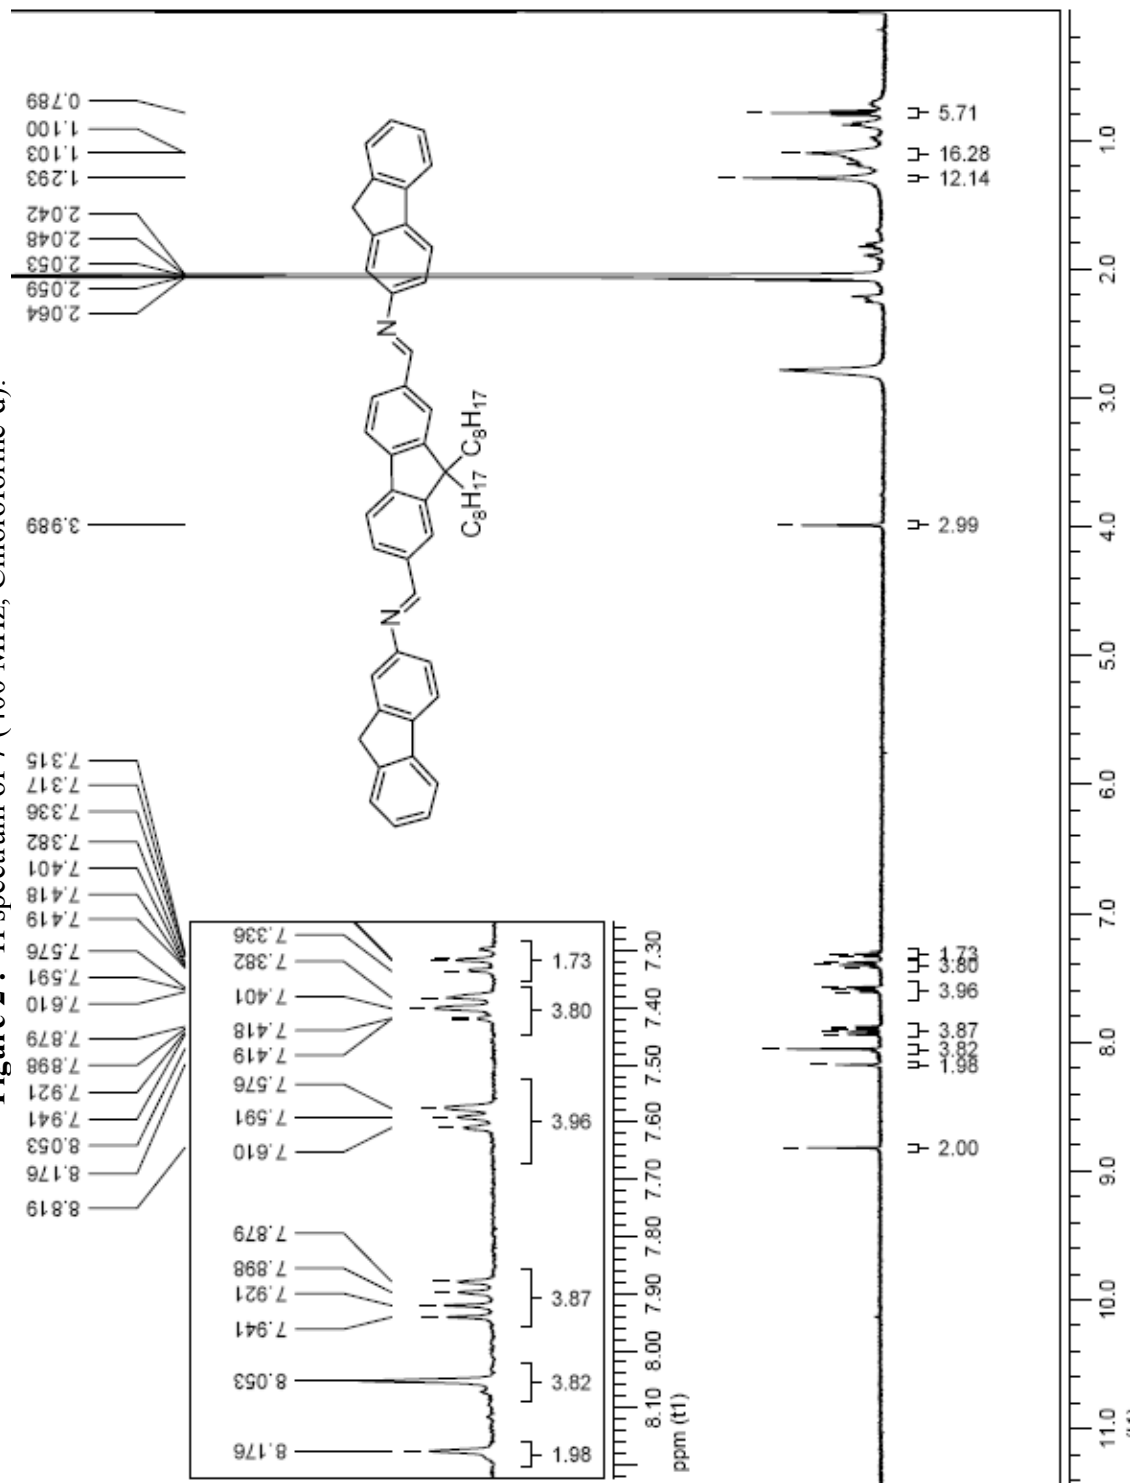

**Figure 3** :  $^1\text{H}$  spectrum of **8** (400 MHz, Acetone- $d_6$ ).

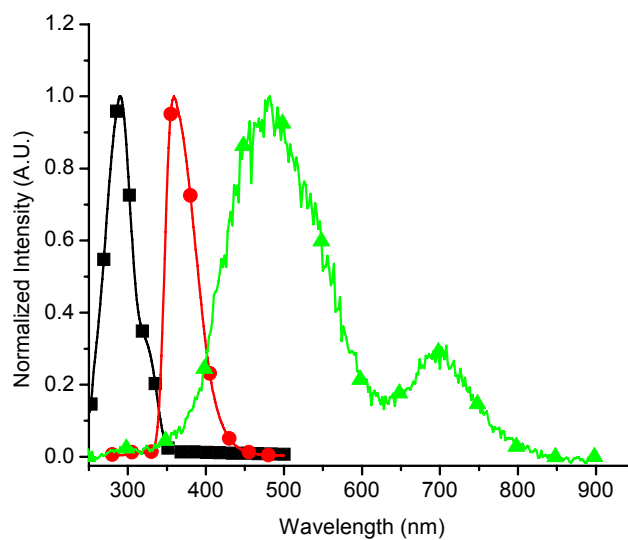

**Figure 4:** Normalized absorption (squares), fluorescence (circles), recorded in degassed dichloromethane, and phosphorescence (triangles) recorded at 77 K in a matrix of 4:1 ethanol / methanol of **2**  $\lambda_{\text{ex}} = 290$  nm.



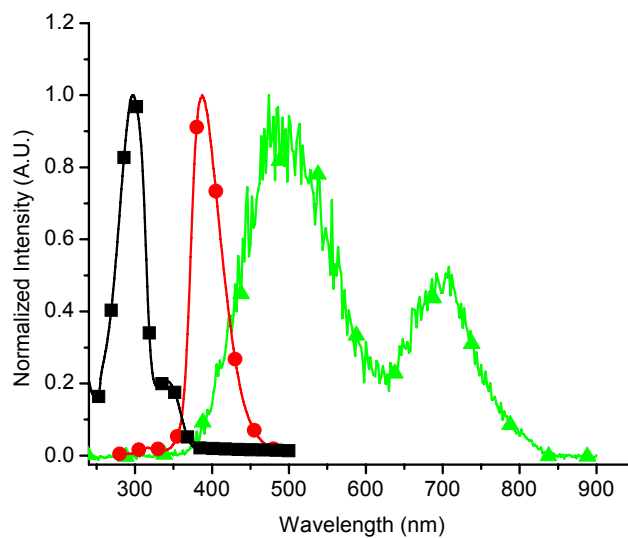

**Figure 5:** Normalized absorption (squares), fluorescence (circles), recorded in degassed dichloromethane, and phosphorescence (triangles) recorded at 77 K in a matrix of 4:1 ethanol / methanol of **3**  $\lambda_{\text{ex}} = 292$  nm.

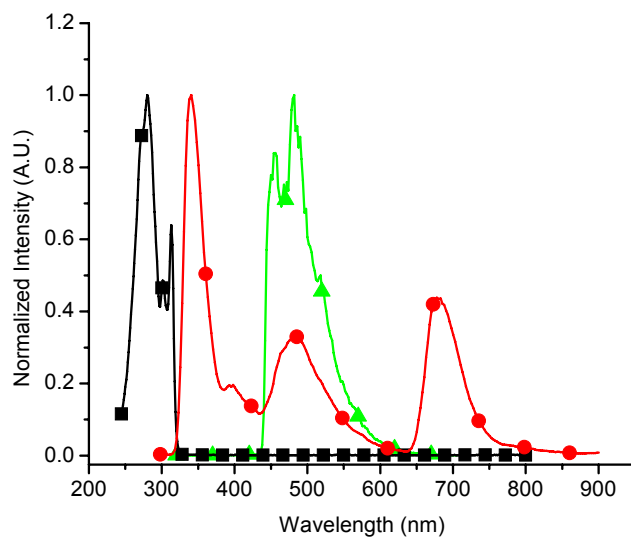

**Figure 6:** Normalized absorption (squares), fluorescence (circles), recorded in degassed dichloromethane, and phosphorescence (triangles) recorded at 77 K in a matrix of 4:1 ethanol / methanol of  $\lambda_{\text{ex}} = 280$  nm.

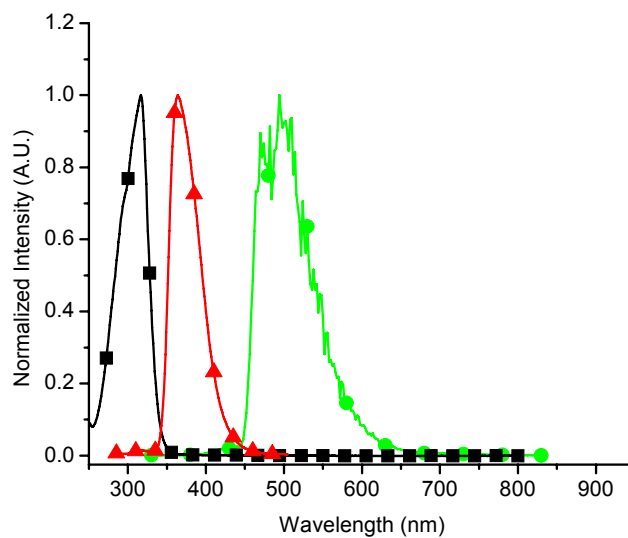

**Figure 7:** Normalized absorption (squares), fluorescence (circles), recorded in degassed dichloromethane, and phosphorescence (triangles) recorded at 77 K in a matrix of 4:1 ethanol / methanol of  $\lambda_{\text{ex}} = 316$  nm.

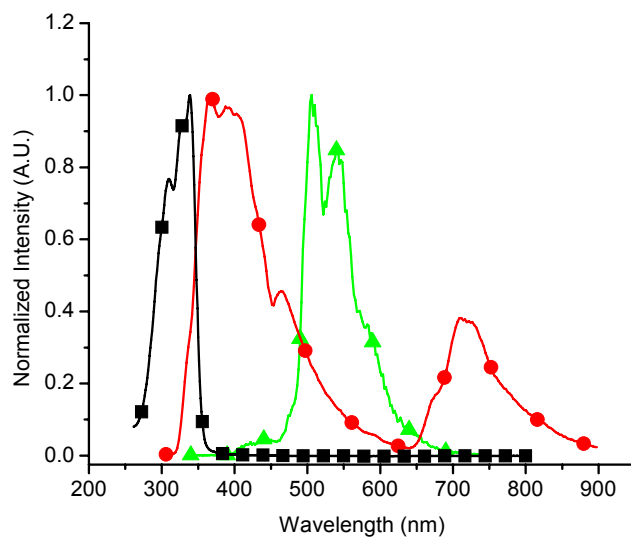

**Figure 8:** Normalized absorption (squares), fluorescence (circles), recorded in degassed dichloromethane, and phosphorescence (triangles) recorded at 77 K in a matrix of 4:1 ethanol / methanol of **6**  $\lambda_{\text{ex}} = 339$  nm.

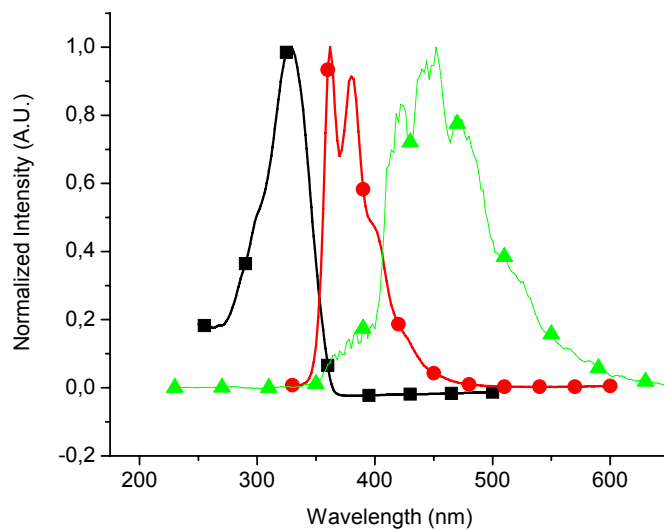

**Figure 9:** Normalized absorption (squares), fluorescence (circles), recorded in degassed dichloromethane, and phosphorescence (triangles) recorded at 77 K in a matrix of 4:1 ethanol / methanol of  $\lambda_{\text{ex}} = 327$  nm.

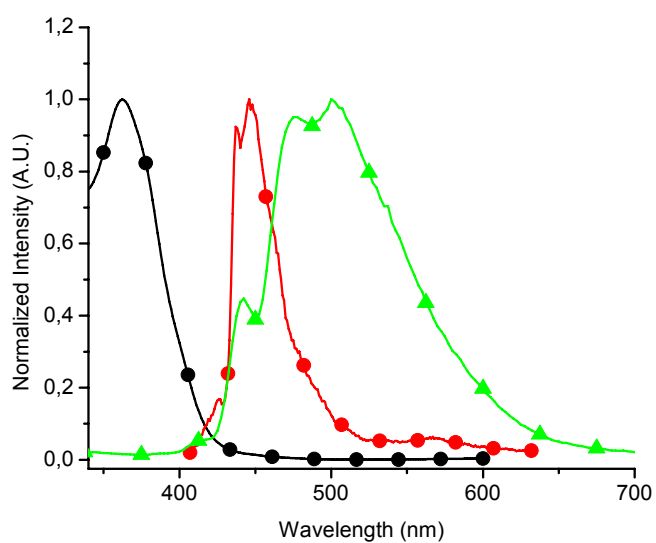

**Figure 10:** Normalized absorption (squares), fluorescence (circles), recorded in degassed dichloromethane of **8**  $\lambda_{\text{ex}} = 361$  nm.

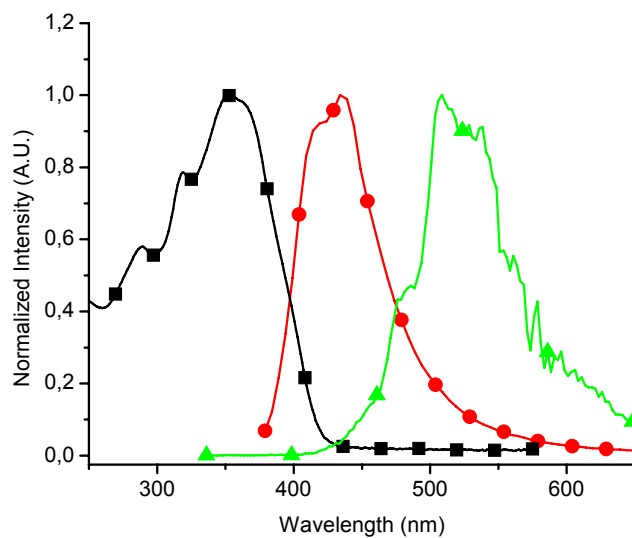

**Figure 11:** Normalized absorption (squares), fluorescence (circles), recorded in degassed dichloromethane, and phosphorescence (triangles) recorded at 77 K in a matrix of 4:1 ethanol / methanol of **9**  $\lambda_{\text{ex}} = 355$  nm.

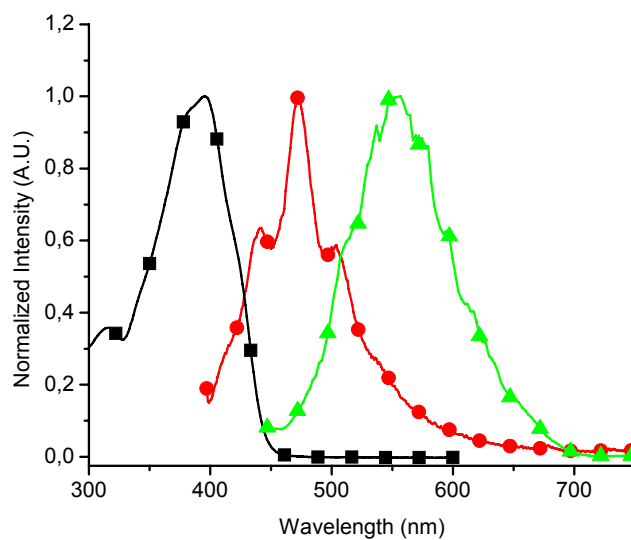

**Figure 12:** Normalized absorption (squares), fluorescence (circles), recorded in degassed dichloromethane, and phosphorescence (triangles) recorded at 77 K in a matrix of 4:1 ethanol / methanol of  $10^{-5}$   $\lambda_{\text{ex}} = 386$  nm.



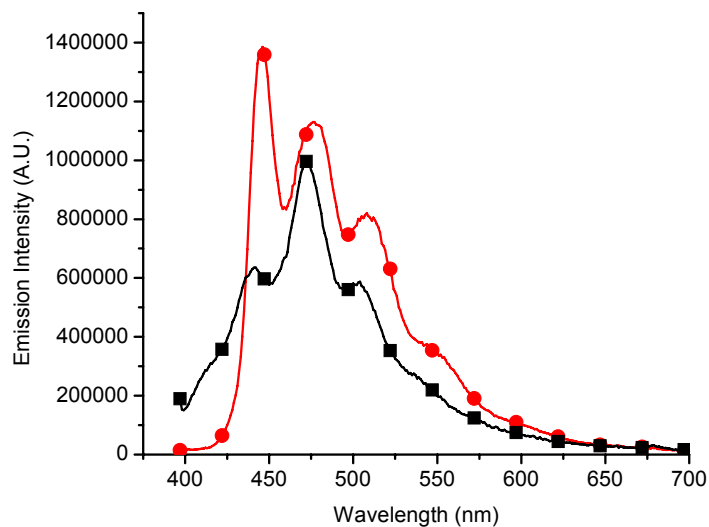

**Figure 13:** Fluorescence at 25 °C (squares) and at 77 K (circles) recorded in a degassed matrix of 4:1 ethanol / methanol of **10**,  $\lambda_{\text{ex}} = 386$  nm.

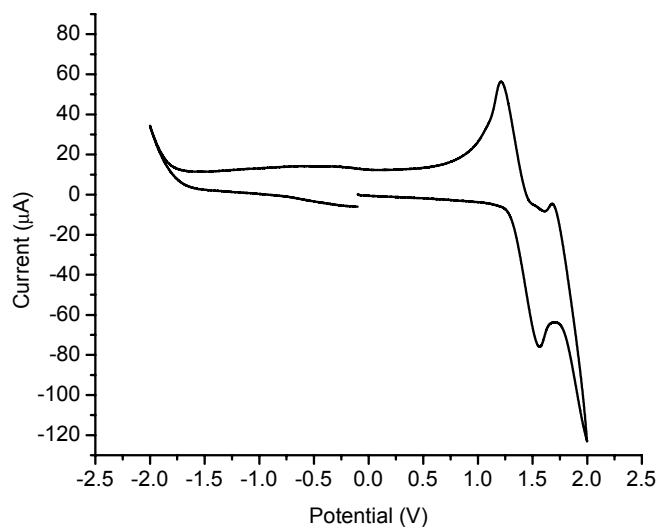

**Figure 14:** Uncorrected cyclic voltammogram of **7** recorded in deaerated dichloromethane solution of 0.1 M of TBAPF<sub>6</sub> using Ag/AgCl as reference and Pt as working electrodes.

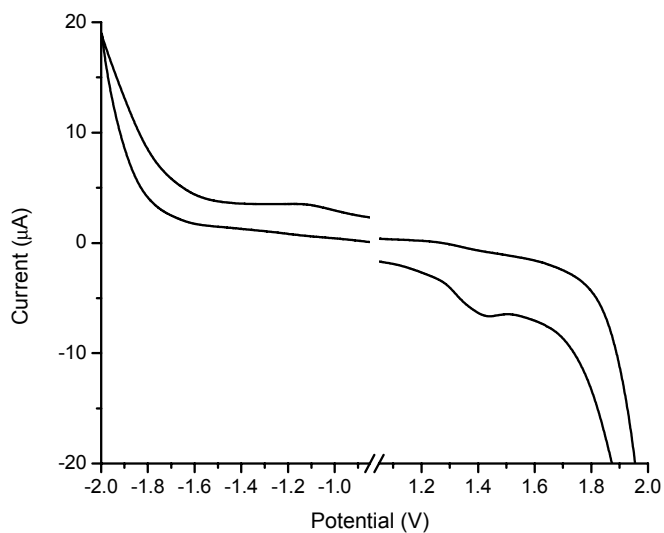

**Figure 15:** Uncorrected cyclic voltammogram of **10** recorded in deaerated dichloromethane solution of 0.1 M of TBAPF<sub>6</sub> using Ag/AgCl as reference and Pt as working electrodes.
